# Supplementary material for: Recommendations for Accurate Resolution of Gene and Isoform Allele-Specific Expression in RNA-Seq Data
Source: PLOS journal article supplement (doi:10.1371/journal.pone.0126911), 2015-05-12

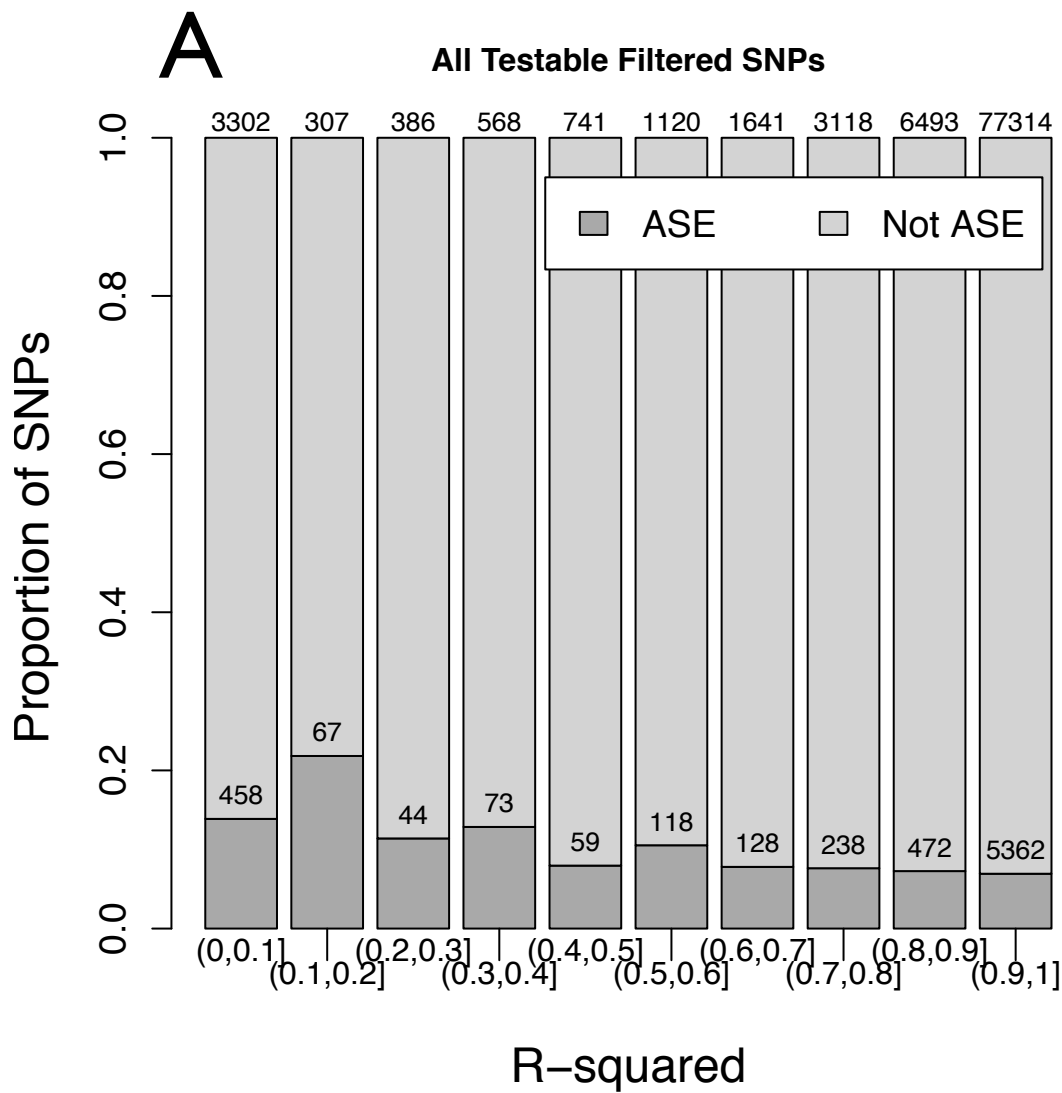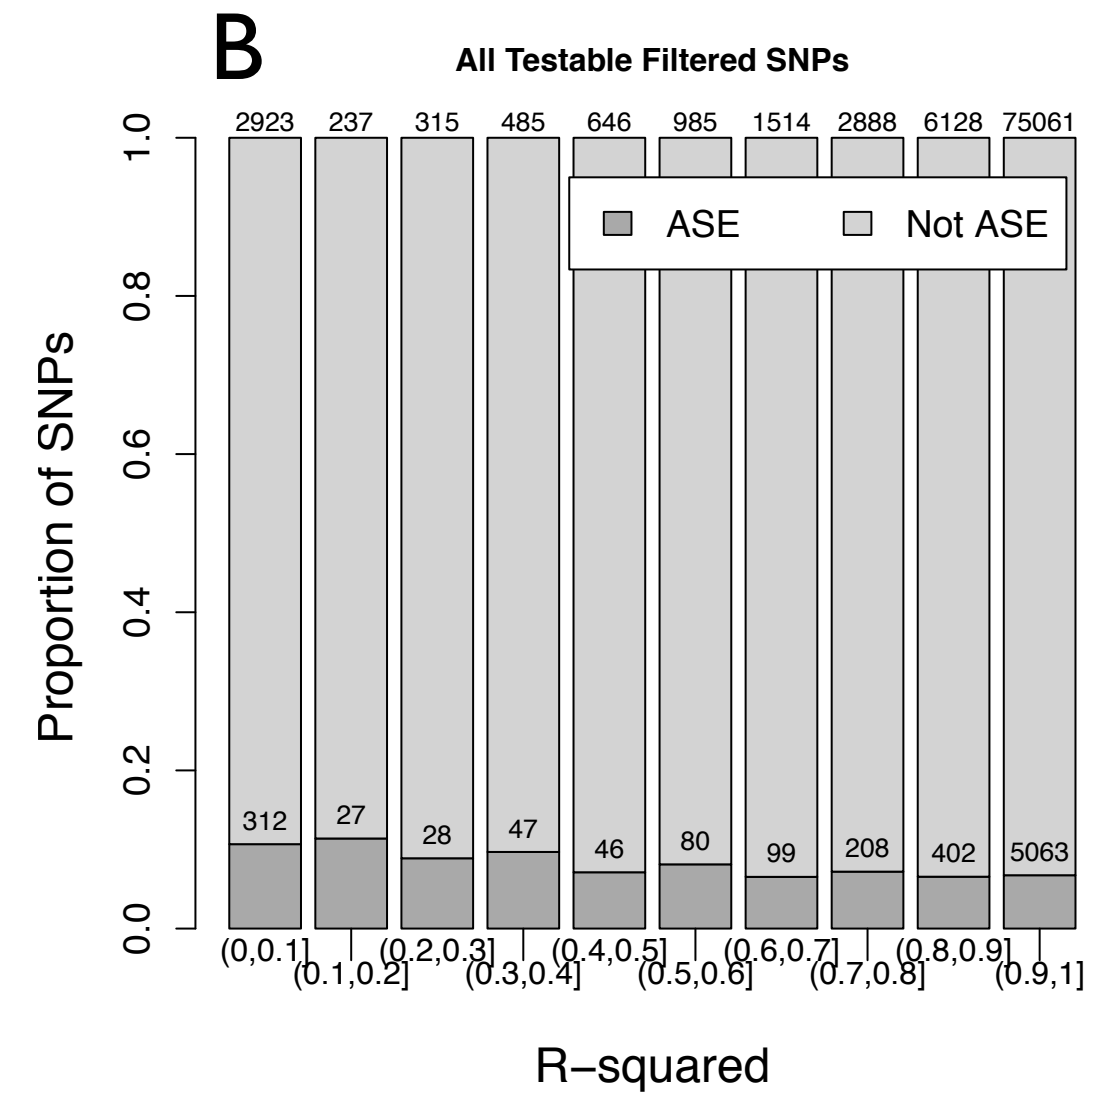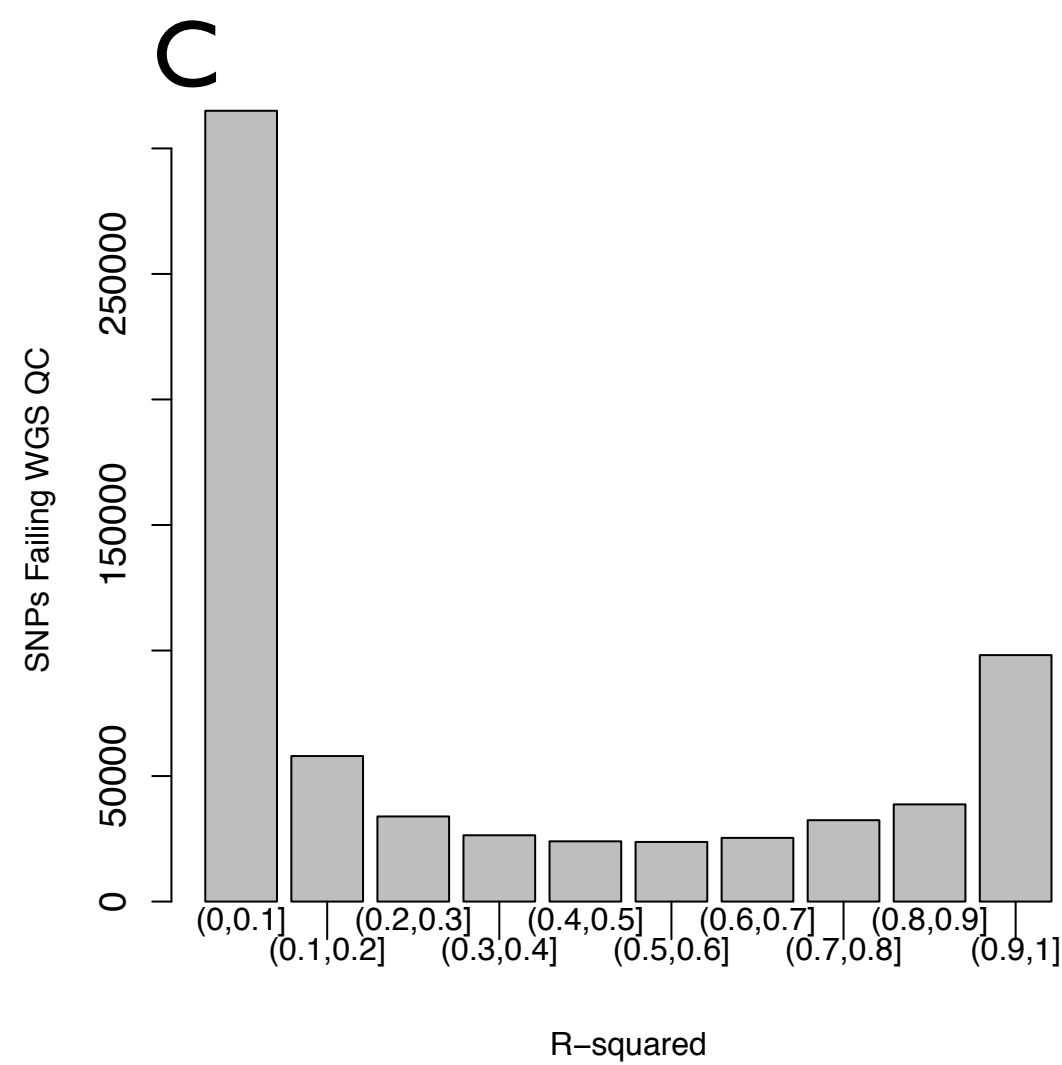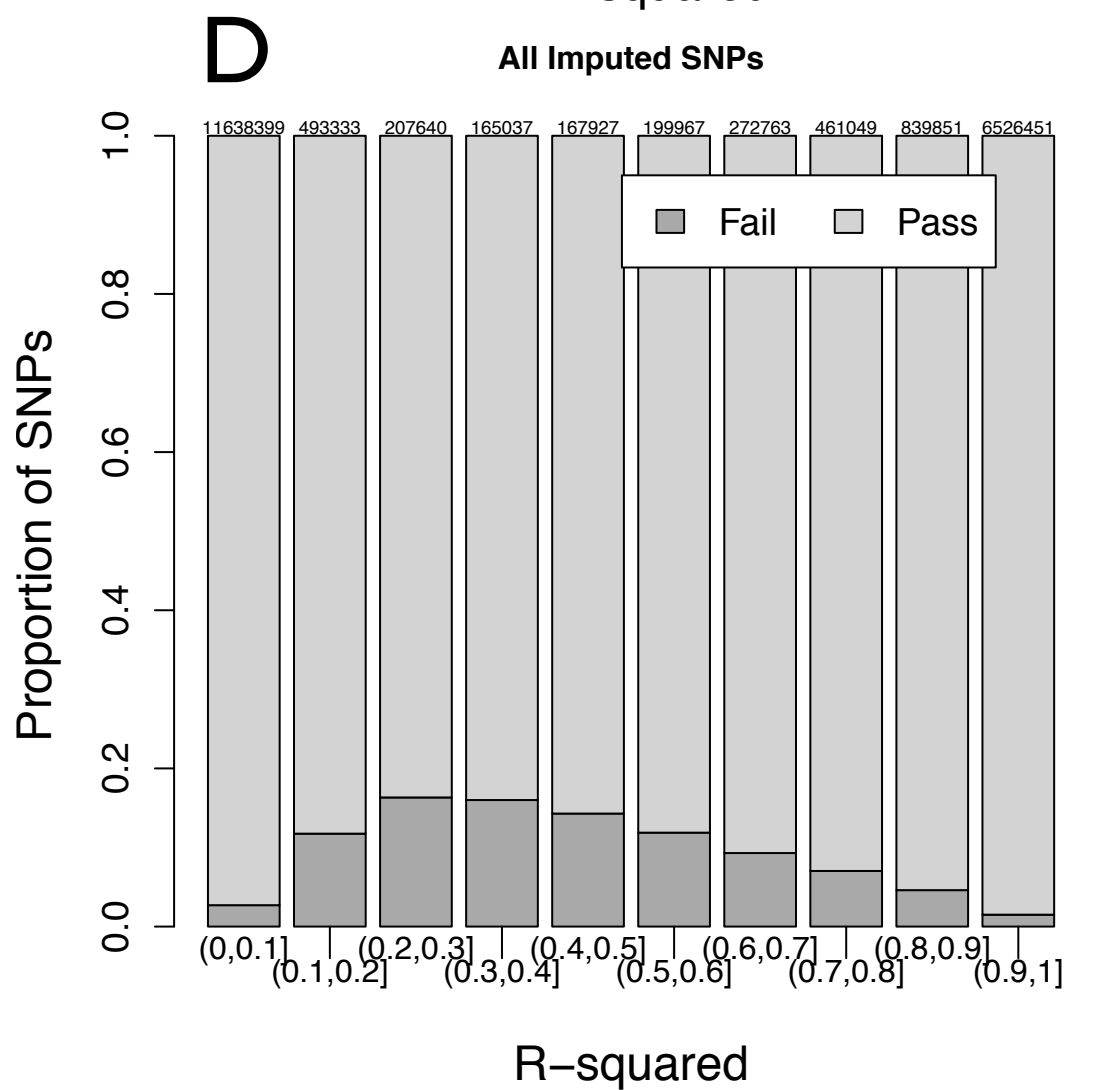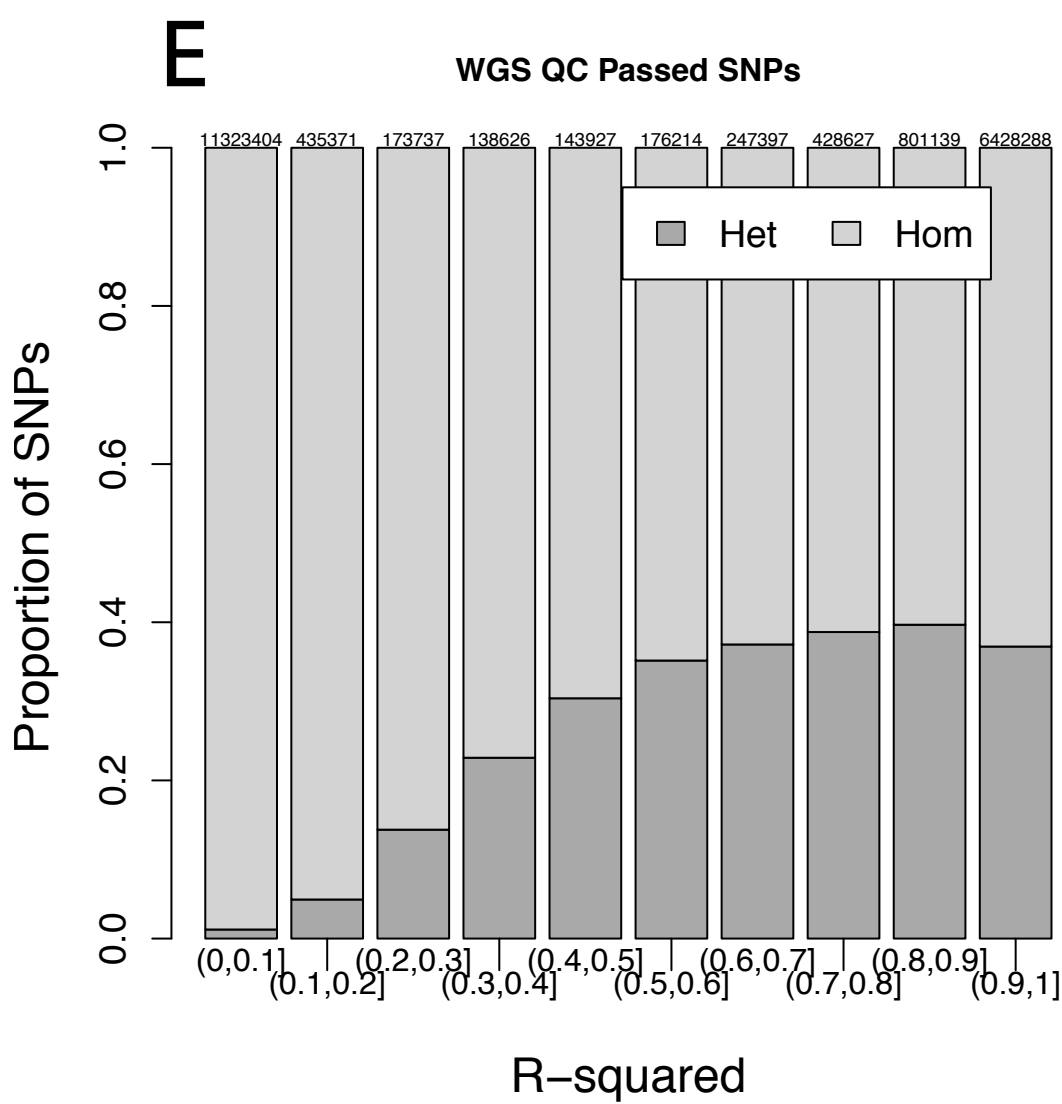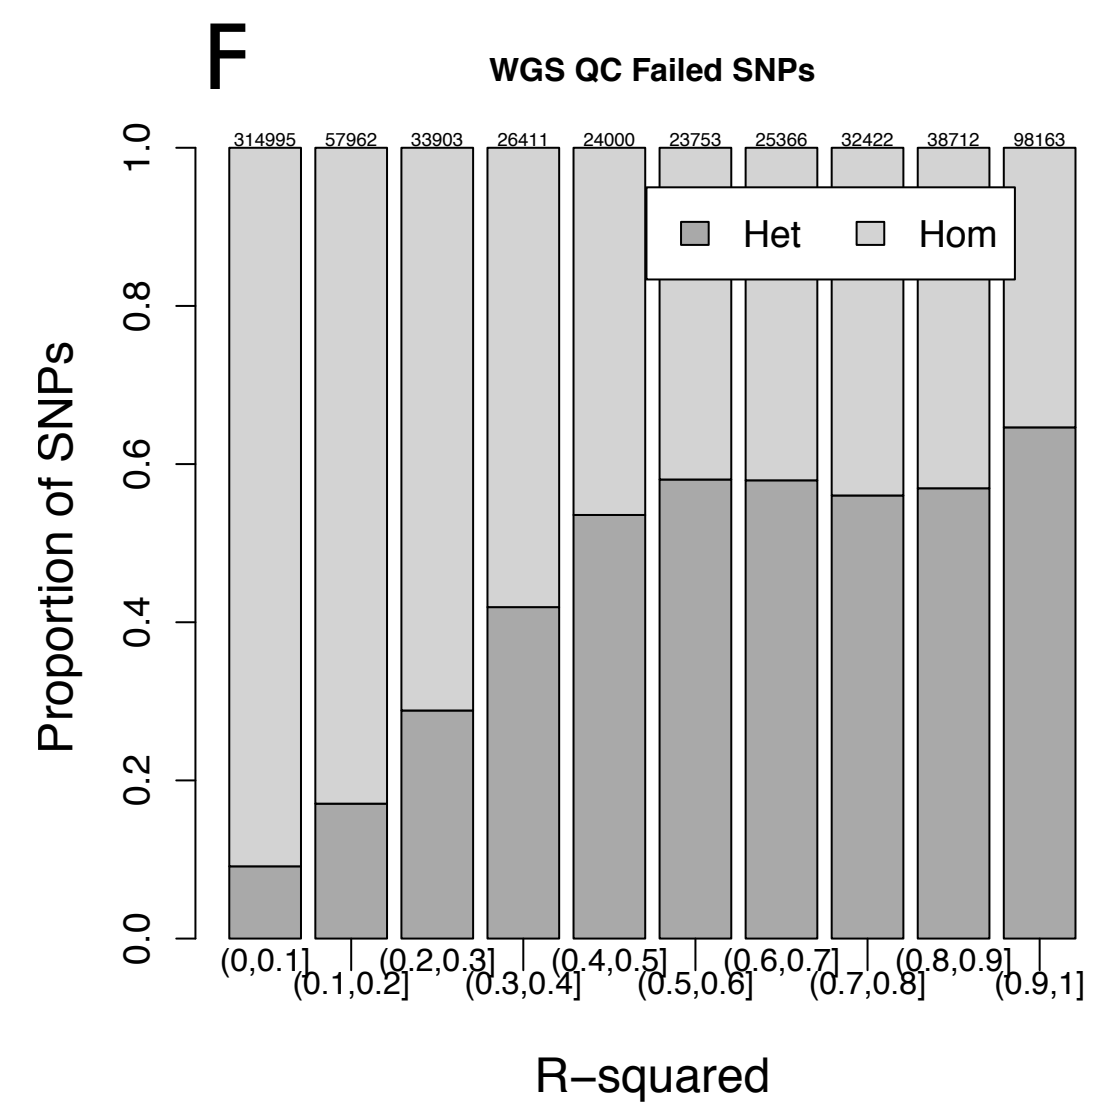

Supplement: S6 (10.1371/journal.pone.0126911.s006) [file journal.pone.0126911.s006]
