# Supplementary material for: Recommendations for Accurate Resolution of Gene and Isoform Allele-Specific Expression in RNA-Seq Data
Source: PLoS One. 2015 May 12;10(5):e0126911. doi: 10.1371/journal.pone.0126911 (PMC4428808; doi:10.1371/journal.pone.0126911)
Supplement: S6 Table — (XLSX) [file pone.0126911.s025.xlsx]

## Sheet: TableS6
Diploid Alignment Read Depth	bothNotASE	bothASE	Rep1ASE	Rep2ASE	Total Testable
10	26574 (86.39%)	764 (2.48%)	1630 (5.3%)	1794 (5.83%)	30762 (100%)
20	11764 (85.76%)	476 (3.47%)	717 (5.23%)	760 (5.54%)	13717 (100%)
50	4234 (89.95%)	193 (4.1%)	151 (3.21%)	129 (2.74%)	4707 (100%)
100	1736 (92.93%)	86 (4.6%)	18 (0.96%)	28 (1.5%)	1868 (100%)
