# Supplementary material for: Recommendations for Accurate Resolution of Gene and Isoform Allele-Specific Expression in RNA-Seq Data
Source: PLOS journal article supplement (doi:10.1371/journal.pone.0126911), 2015-05-12

## Brain

A

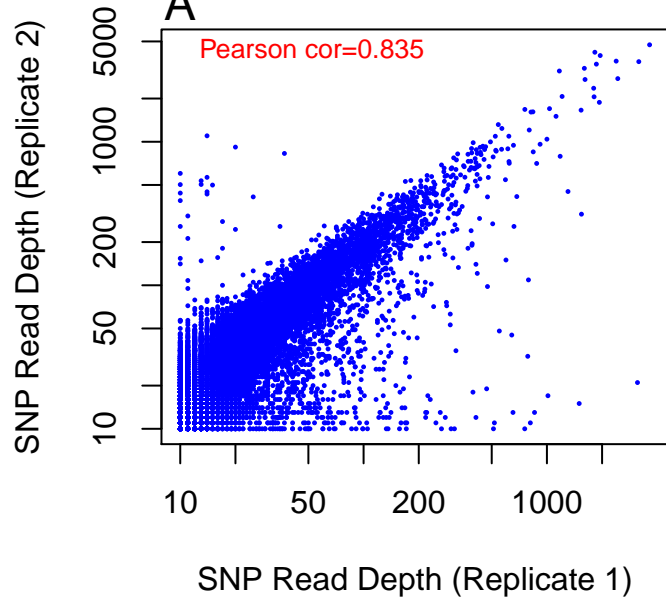

## Liver

B

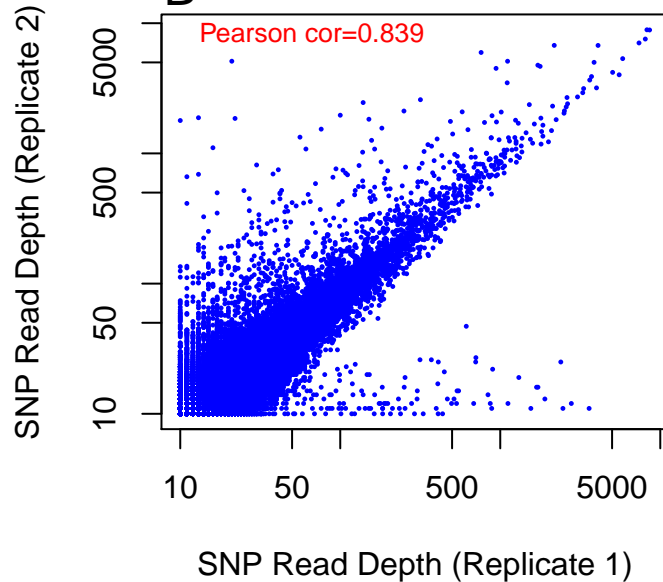

Supplement: S11 (10.1371/journal.pone.0126911.s011) [file journal.pone.0126911.s011]
